# Supplementary material for: Middle Stone Age Ochre Processing and Behavioural Complexity in the Horn of Africa: Evidence from Porc-Epic Cave, Dire Dawa, Ethiopia
Source: PubMed Central journal article supplement (PMC5091854; doi:10.1371/journal.pone.0164793), 2016-11-02
Supplement: pone.0164793.s002.pdf [file pone.0164793.s002.pdf]

# Middle Stone Age Ochre Processing and Behavioural Complexity in the Horn of Africa: Evidence from Porc-Epic Cave, Dire Dawa, Ethiopia

Daniela Eugenia Rosso\*, Africa Pitarch Martí, Francesco d'Errico

\* Corresponding author

E-mail: d.rosso@pacea.u-bordeaux1.fr (DR)

## **S2 Figures. Results of analyses conducted on ochre processing tools 12–14; 16–23 and ochre-stained artefact 15.**

Photos of the artefacts, modification marks and residues, SEM-EDS images and XRD diffractograms. The objects' identification number is the same as presented in Figs 4–11, Tables 1–5, S1 Figs, S1 Tables, S1 Texts.

|                                                                            |    |
|----------------------------------------------------------------------------|----|
| Figure A. Results of analyses conducted on ochre processing tool 12 .....  | 2  |
| Figure B. Results of analyses conducted on ochre processing tool 13 .....  | 3  |
| Figure C. Results of analyses conducted on ochre processing tool 14 .....  | 4  |
| Figure D. Results of analyses conducted on ochre-stained artefact 15 ..... | 5  |
| Figure E. Results of analyses conducted on ochre processing tool 16 .....  | 6  |
| Figure F. Results of analyses conducted on ochre processing tool 17 .....  | 7  |
| Figure G. Results of analyses conducted on ochre processing tool 18.....   | 8  |
| Figure H. Results of analyses conducted on ochre processing tool 19.....   | 9  |
| Figure I. Results of analyses conducted on ochre processing tool 20.....   | 10 |
| Figure J. Results of analyses conducted on ochre processing tool 21.....   | 11 |
| Figure K. Results of analyses conducted on ochre processing tool 22 .....  | 12 |
| Figure L. Results of analyses conducted on ochre processing tool 23.....   | 13 |

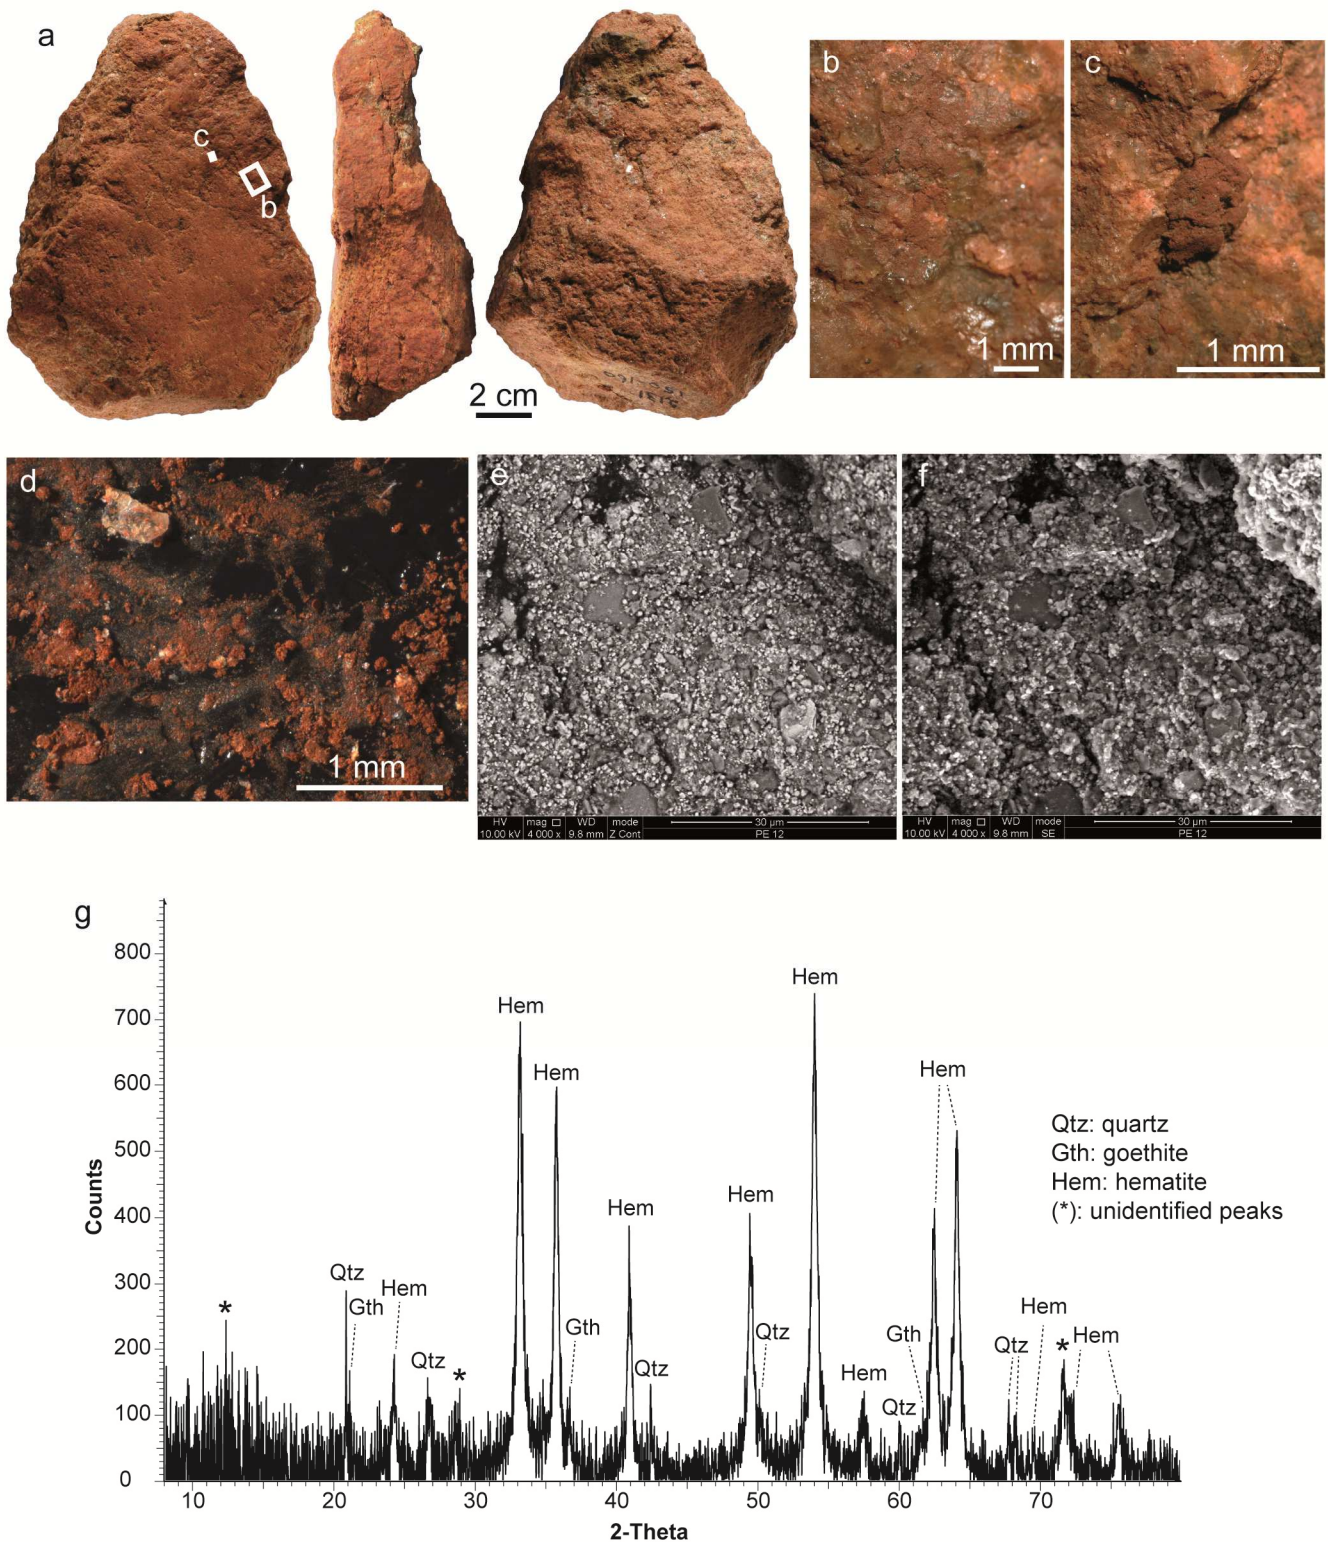

**Fig A. Results of analyses conducted on ochre processing tool 12 (lower grindstone).**  
a: Photo of the object. Squares indicate the location of macro photos b and c; b, c: macro photos of smoothed areas associated with red residues; d: photo of the sampled ochre residue (sample AT11); SEM images in BSE (e) and SE (f) modes of sample AT12; g: X-ray diffractogram of sample T12.

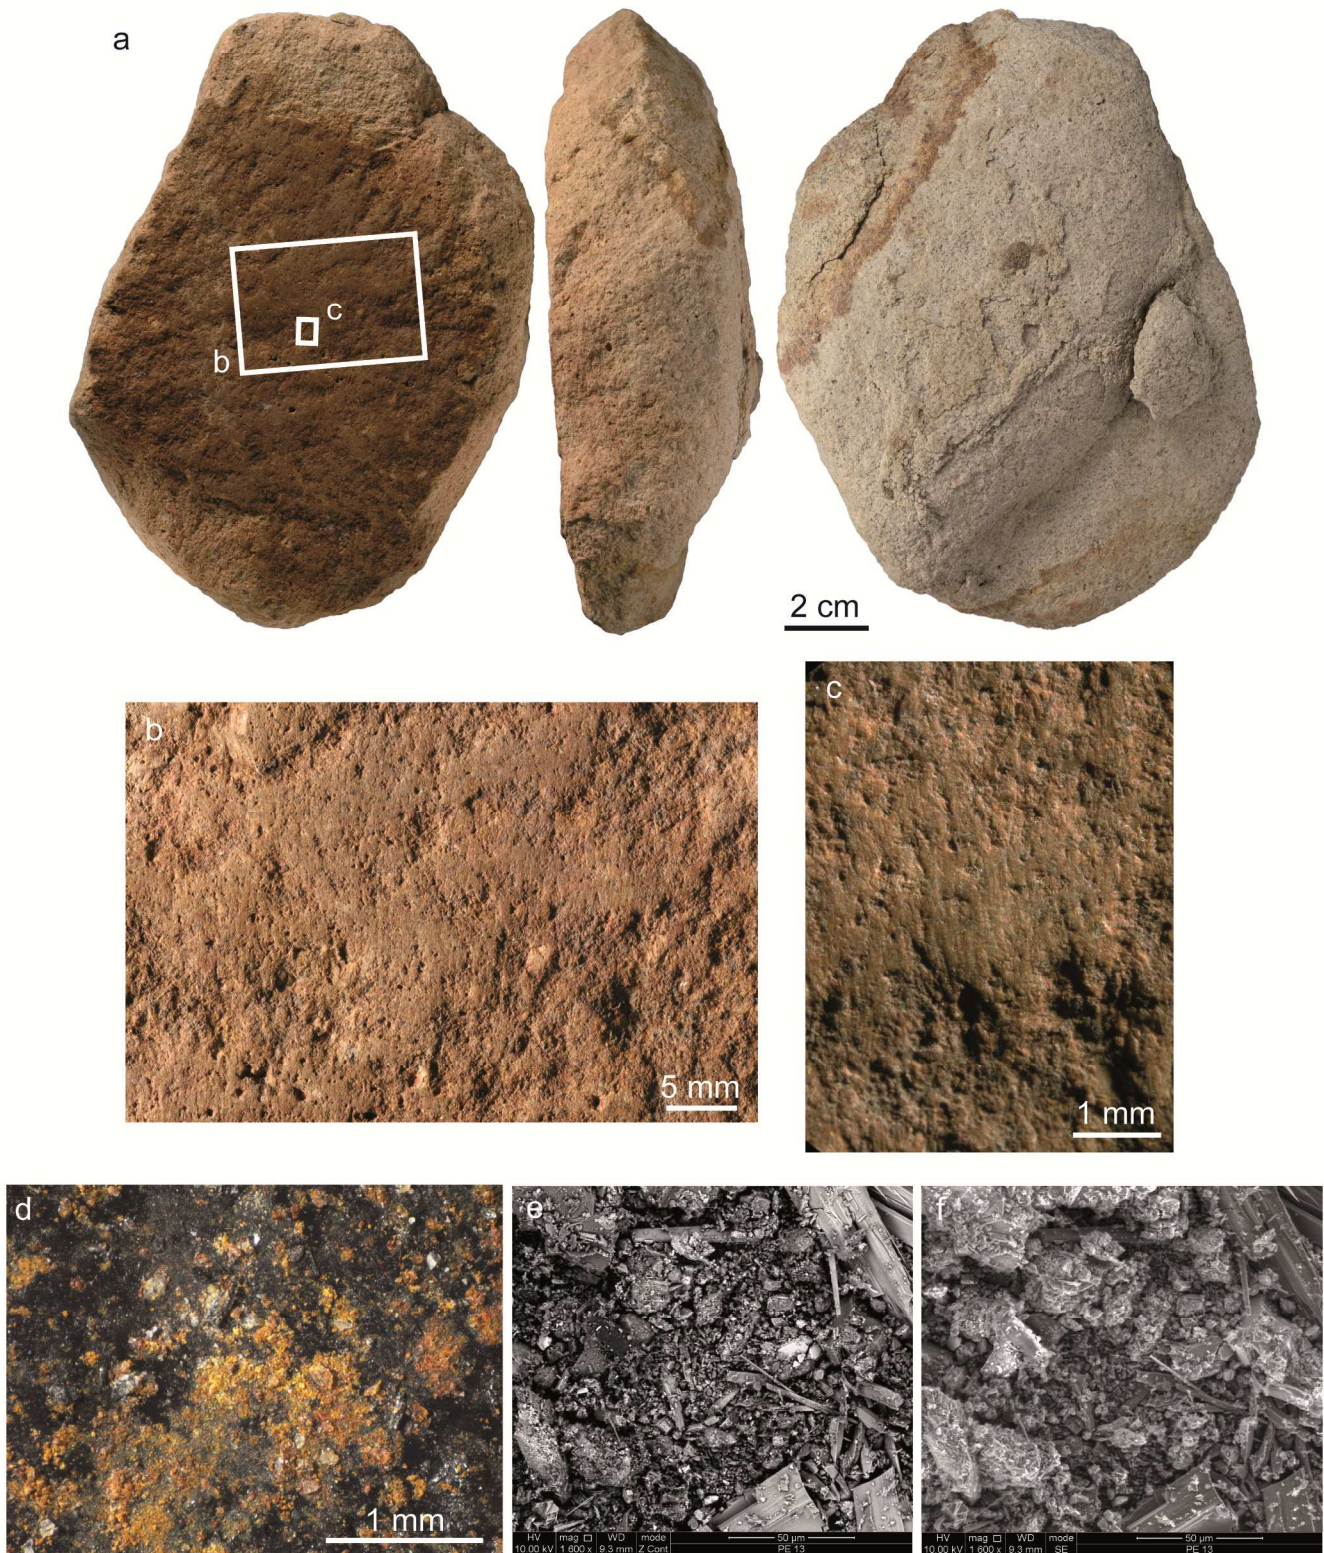

**Fig B. Results of analyses conducted on ochre processing tool 13 (lower grindstone).**  
 a: Photo of the object. Squares indicate the position of macro photos b and c; b, c: macro photos of smoothed areas associated with microstriations and red residues; d: photo of the sampled ochre residue (sample AT13); SEM images in BSE (e) and SE (f) modes of sample AT13.

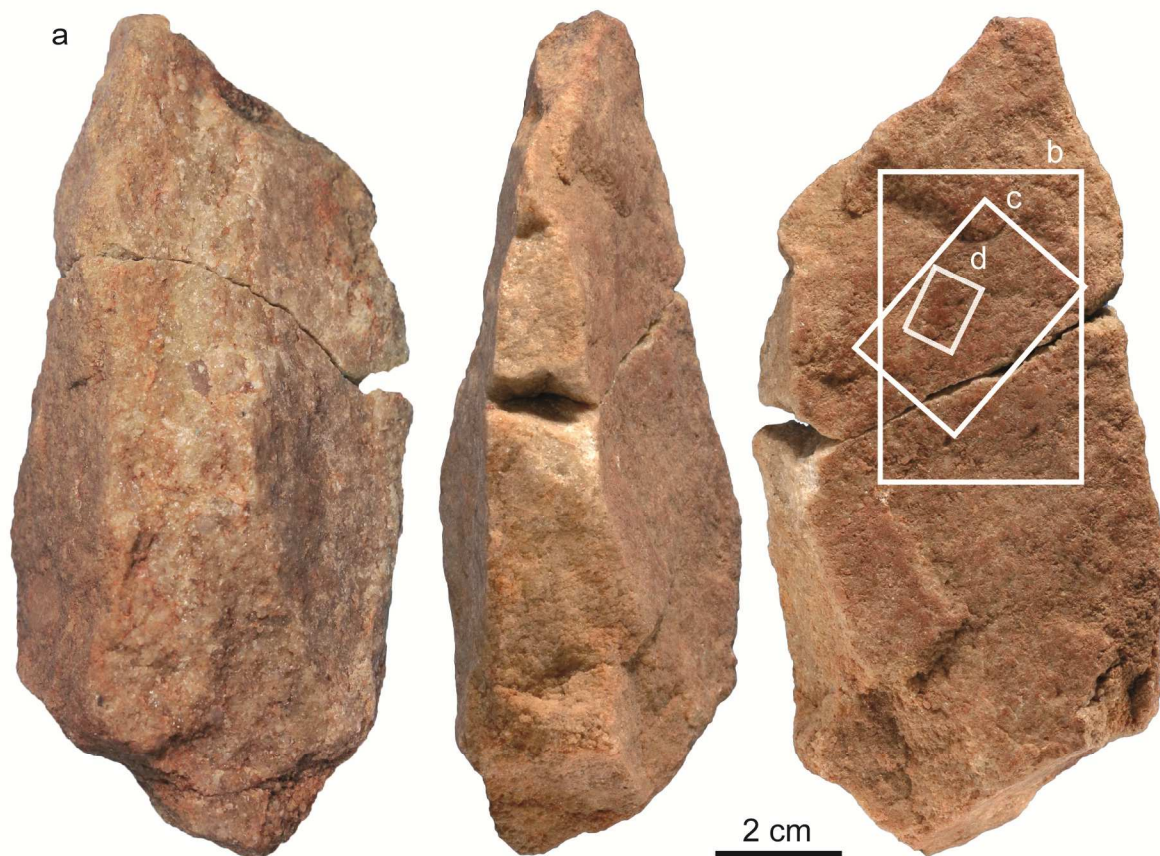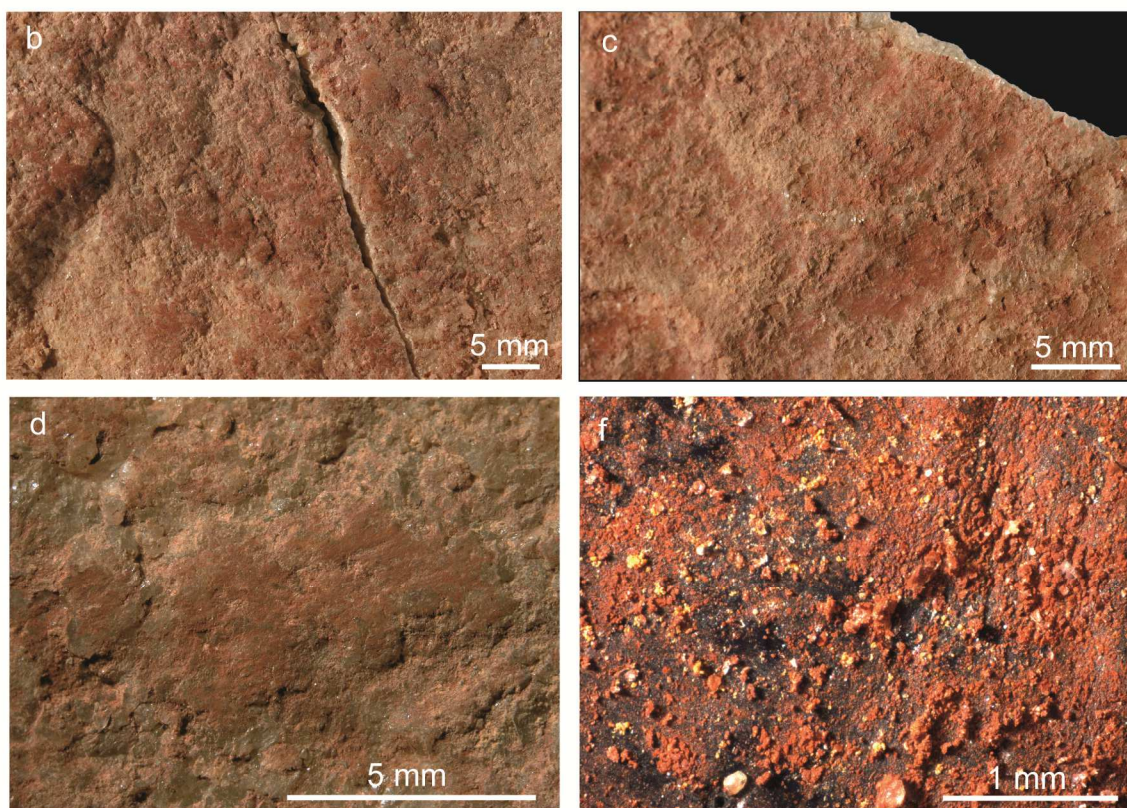

**Fig C. Results of analyses conducted on ochre processing tool 14 (lower grindstone).** a: Photo of the object. Squares indicate the position of macro photos b–d; b–d: macro photos of smoothed areas associated with microstriations and red residues; f: photo of the sampled ochre residue (sample AT14).

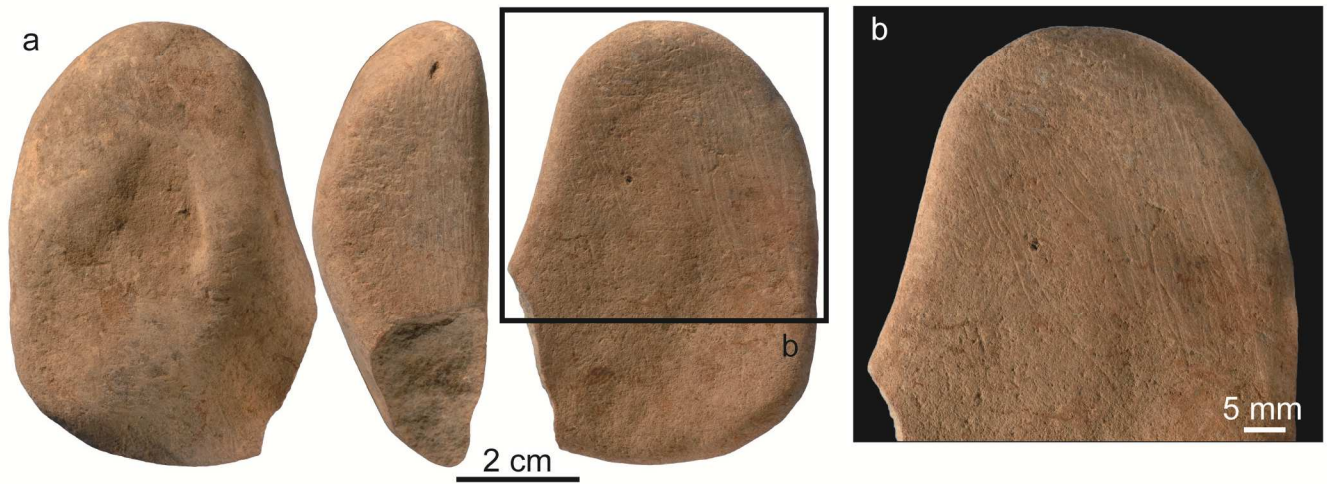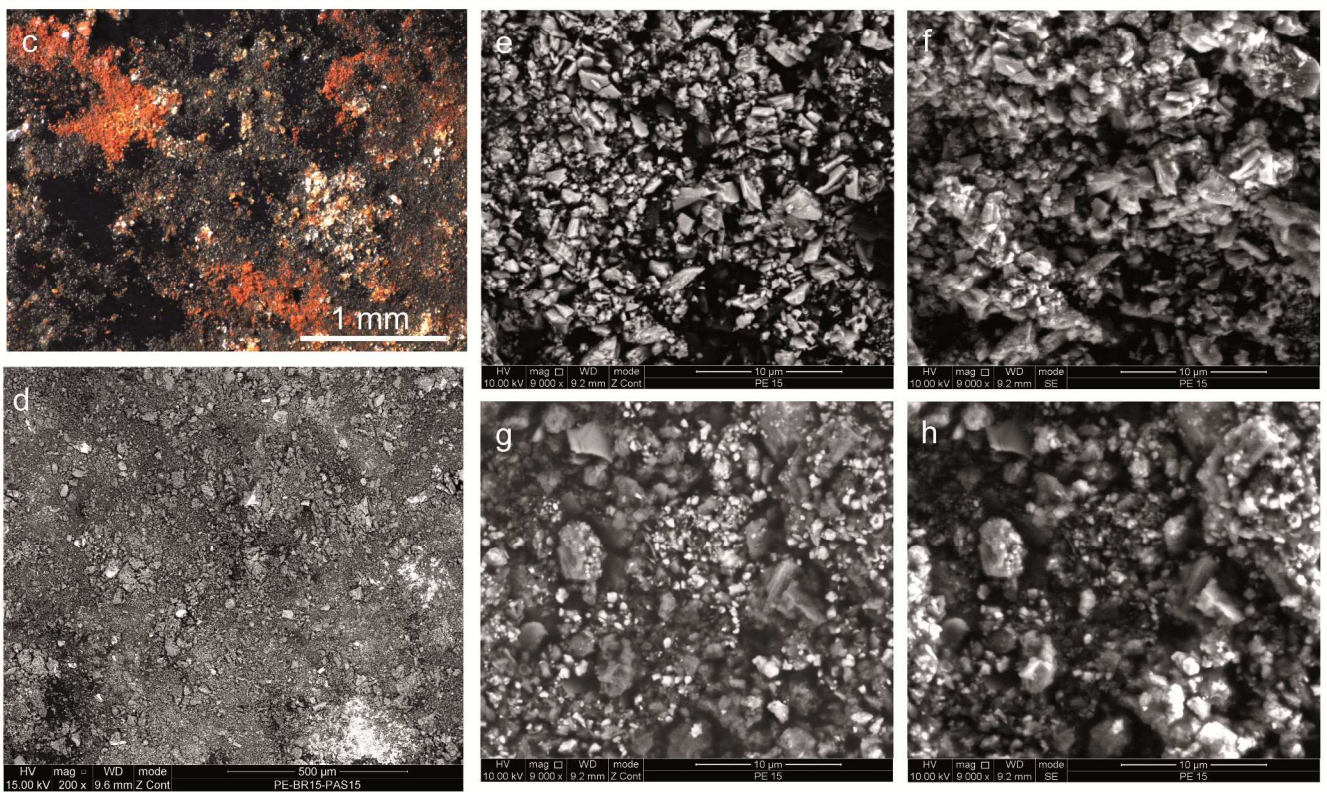

**Fig D. Results of analyses conducted on ochre-stained artefact 15.**

a: Photo of the object. Square indicates the position of macro photo b; b: macro photo of linear impressions associated with striations and red residues; c: photo of the sampled ochre residue (sample AT15); d: SEM image in BSE mode of sample AT15; SEM images in BSE (e) and SE (f) modes of sample AT15 zone 1; SEM images in BSE (g) and SE (h) modes of sample AT15 zone 2.

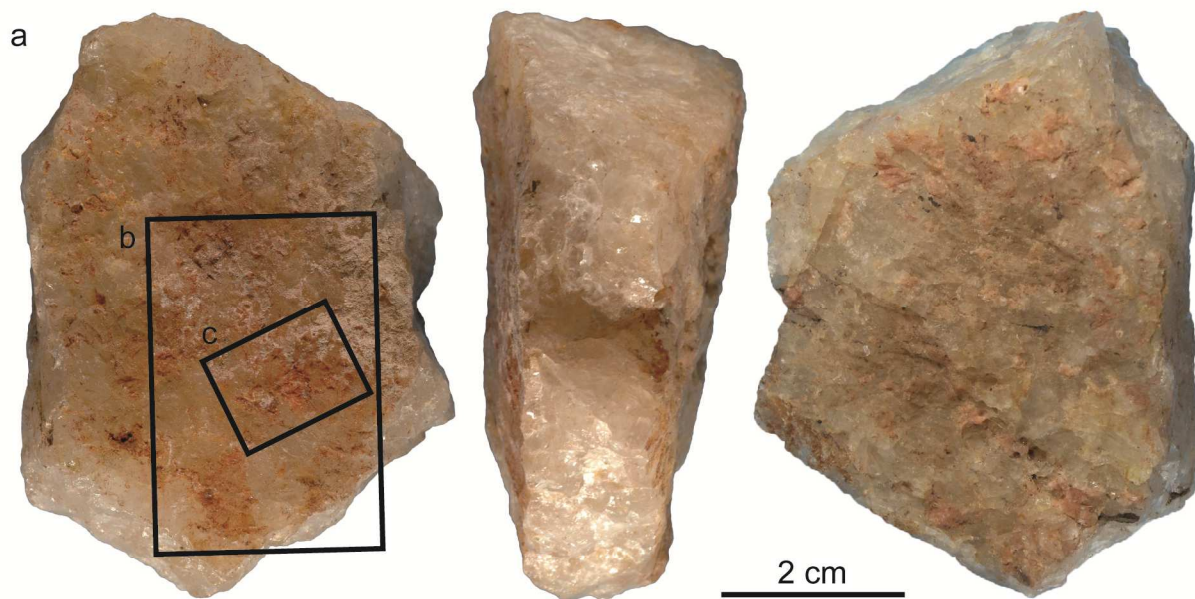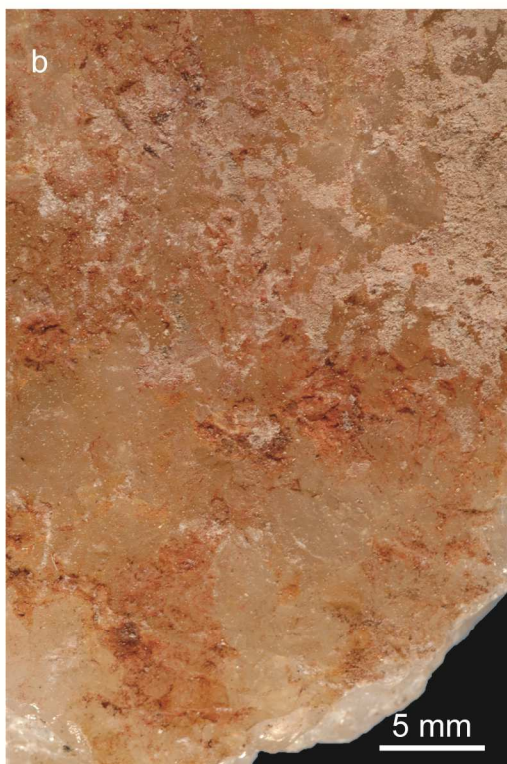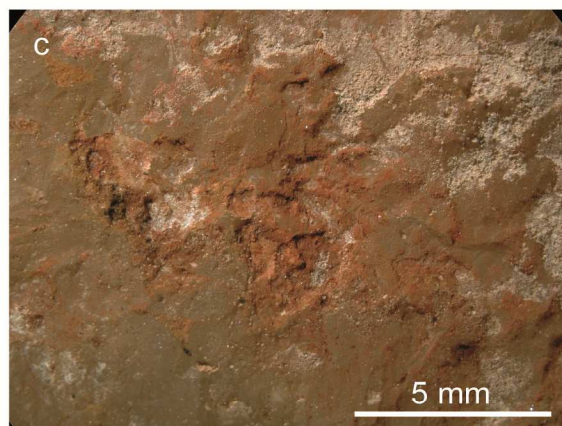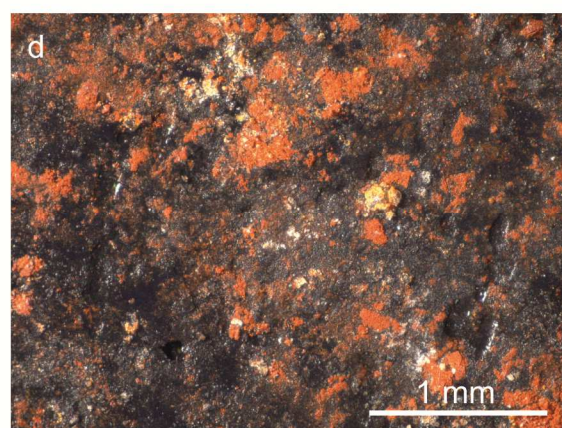

**Fig E. Results of analyses conducted on ochre processing tool 16 (lower grindstone).**  
a: Photo of the object. Squares indicate the location of macro photos b and c; b, c: macro photos of red residues; d: photo of the sampled ochre residue (sample AT16).

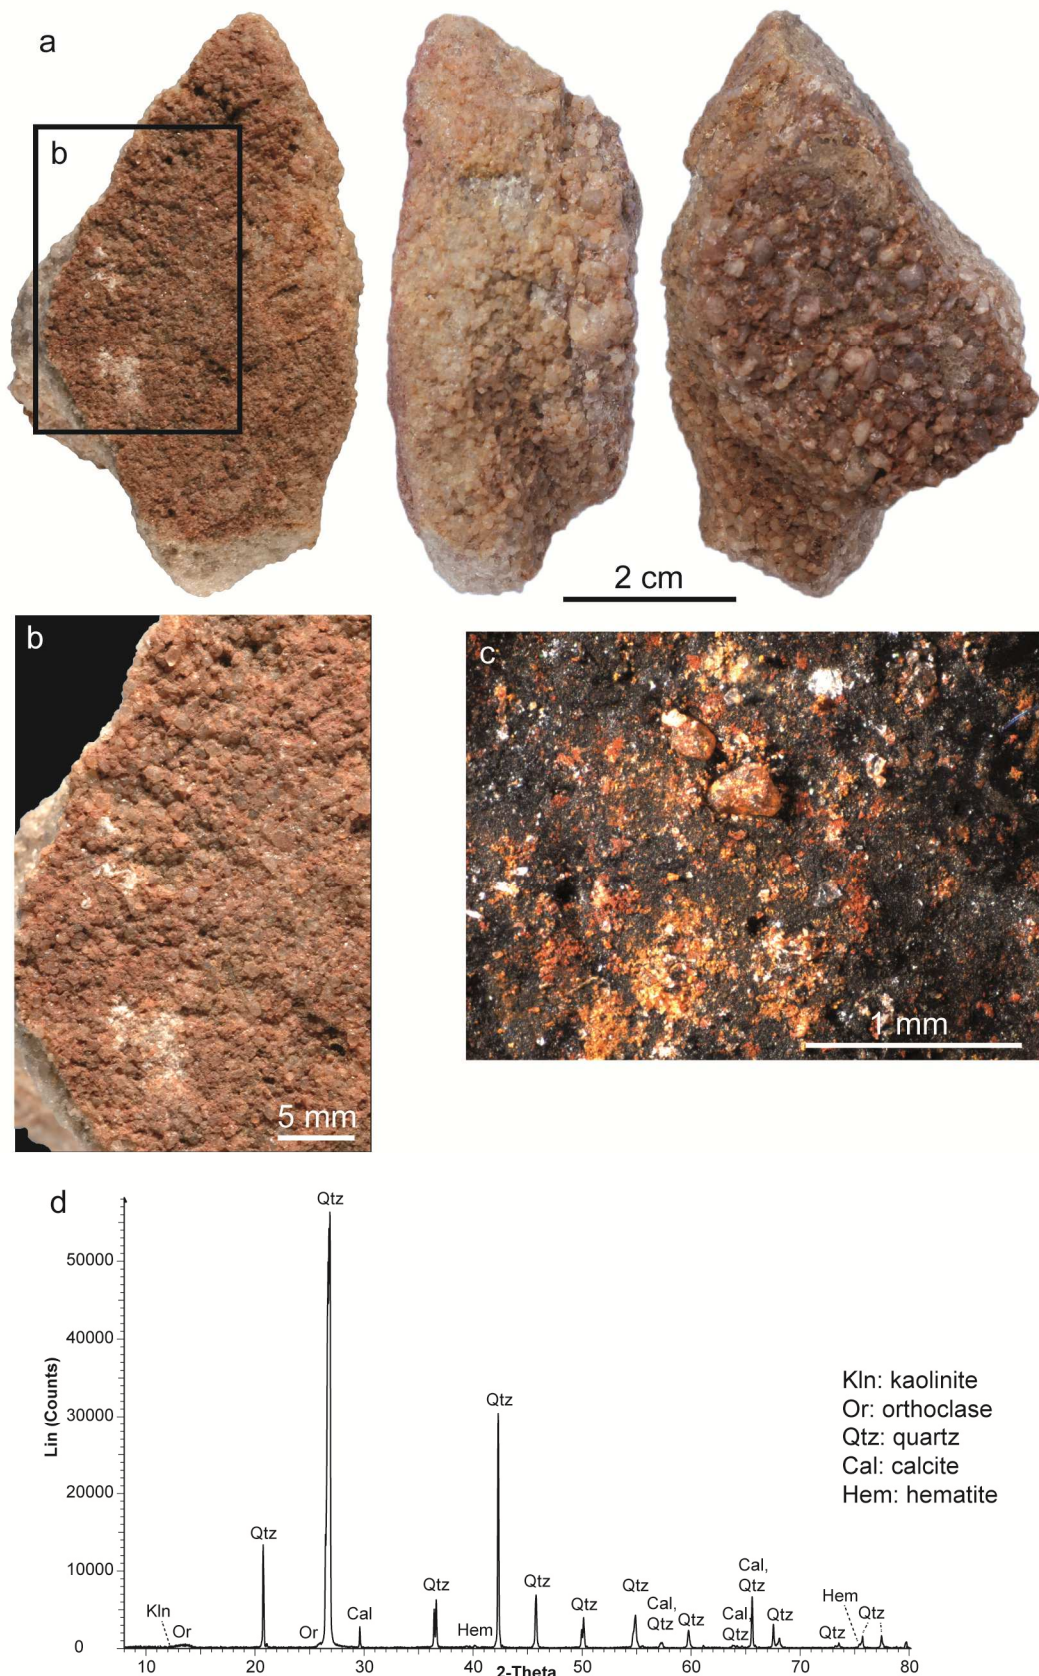

**Fig F. Results of analyses conducted on ochre processing tool 17 (lower grindstone).**  
a: Photo of the object. Square indicates the position of macro photo b; b: macro photo of red residues; c: photo of the sampled ochre residue (sample AT17); d: X-ray diffractogram of sample T17.

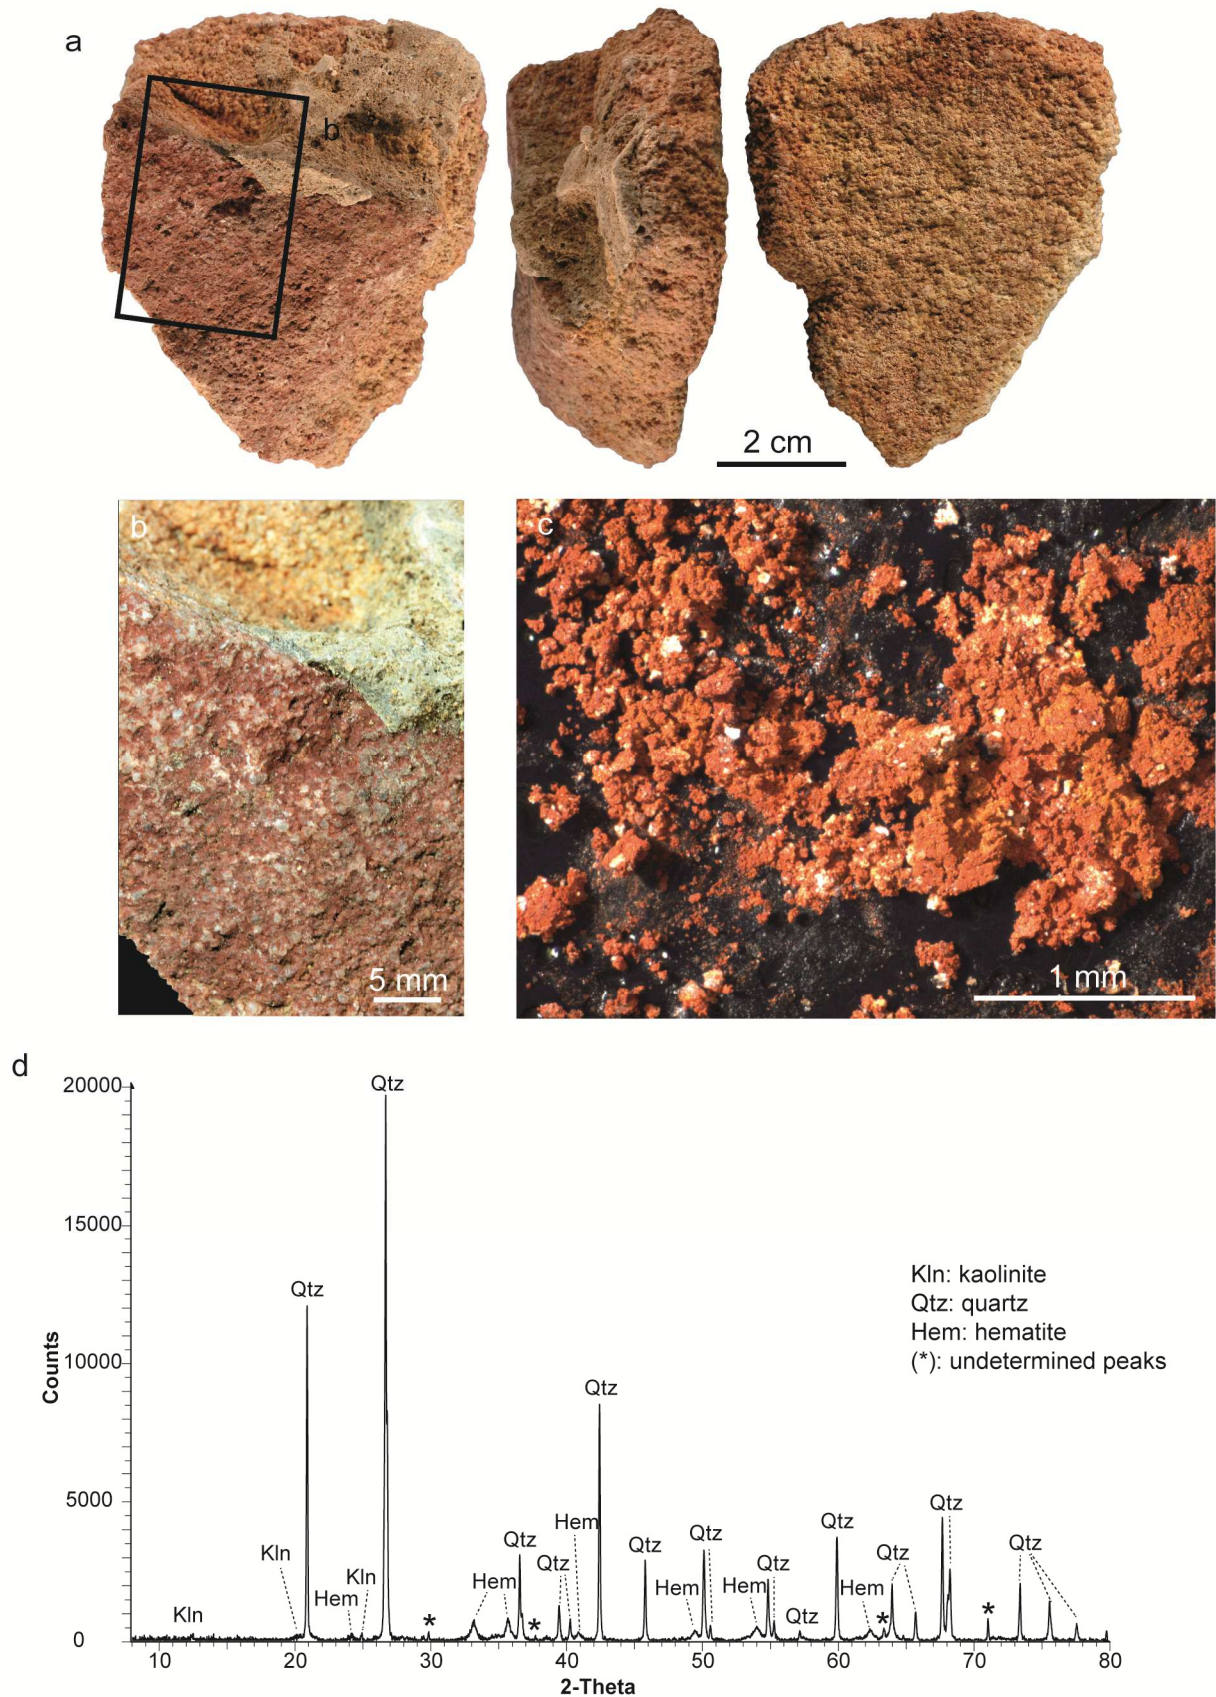

**Fig G. Results of analyses conducted on ochre processing tool 18 (lower grindstone).** a: Photo of the object. Square indicates the position of macro photo b; b: macro photo of red residues; c: photo of the sampled ochre residue (sample AT18); d: X-ray diffractogram of sample T18.



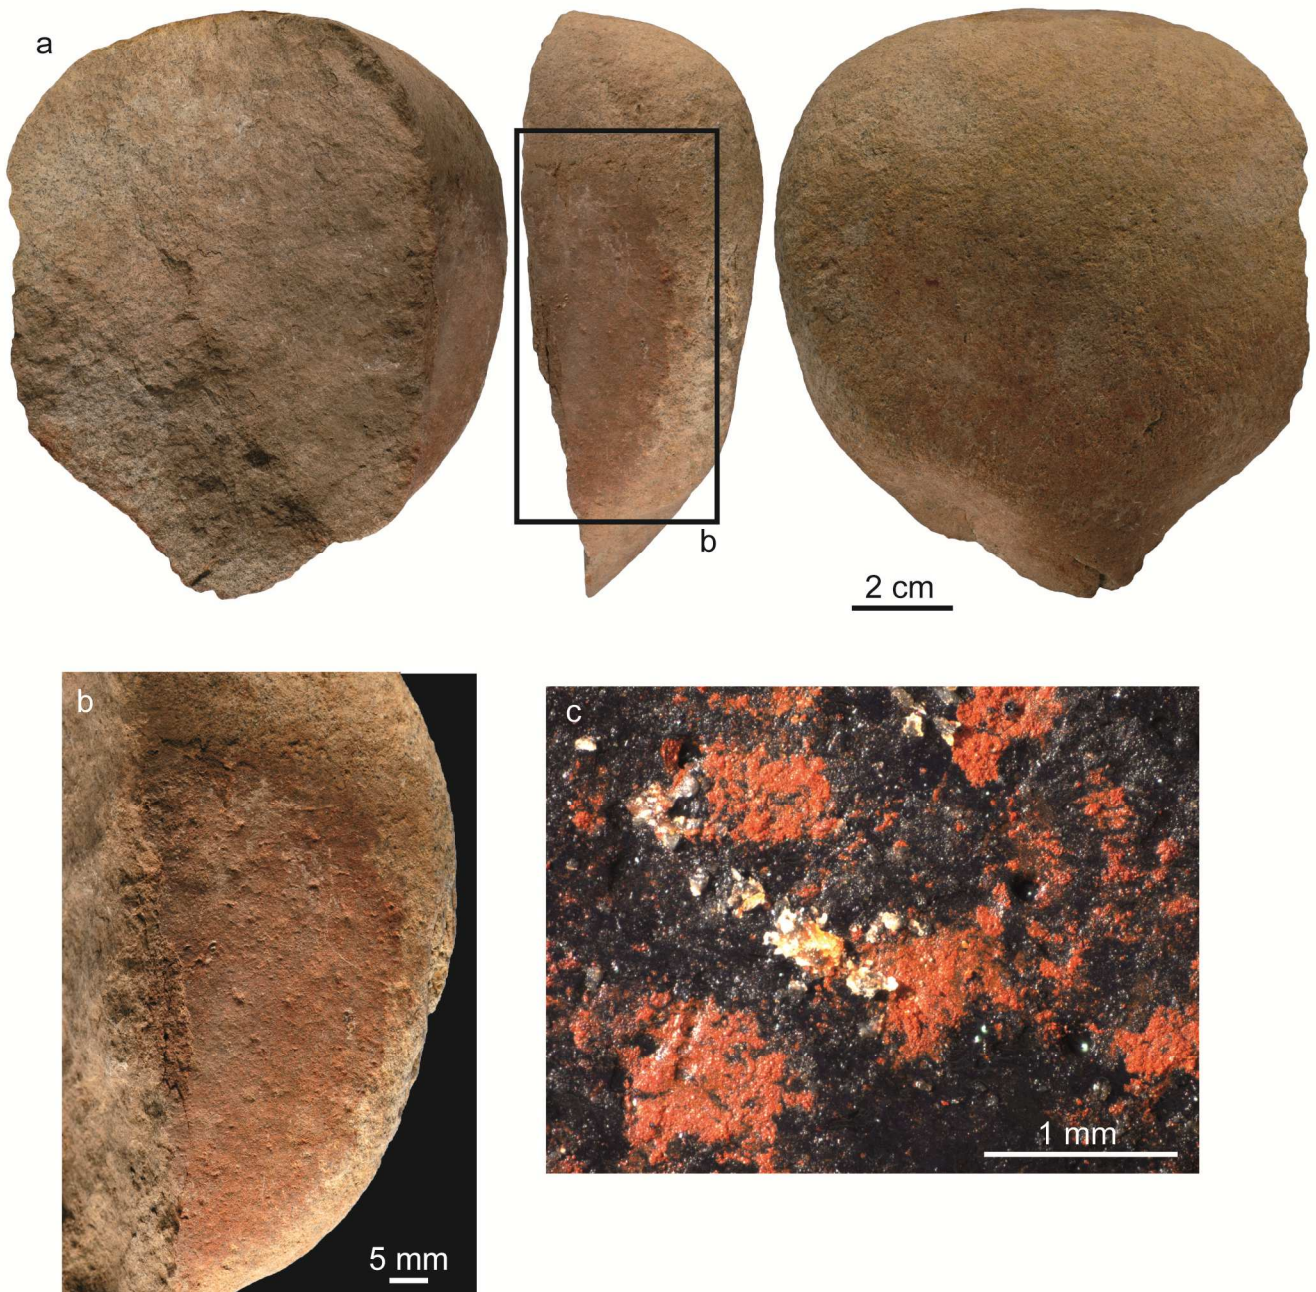

**Fig H. Results of analyses conducted on ochre processing tool 19 (upper grindstone).**

a: Photo of the object. Square indicates the position of macro photo b; b: macro photo of pits associated with red residues; c: photo of the sampled ochre residue (sample AT19).

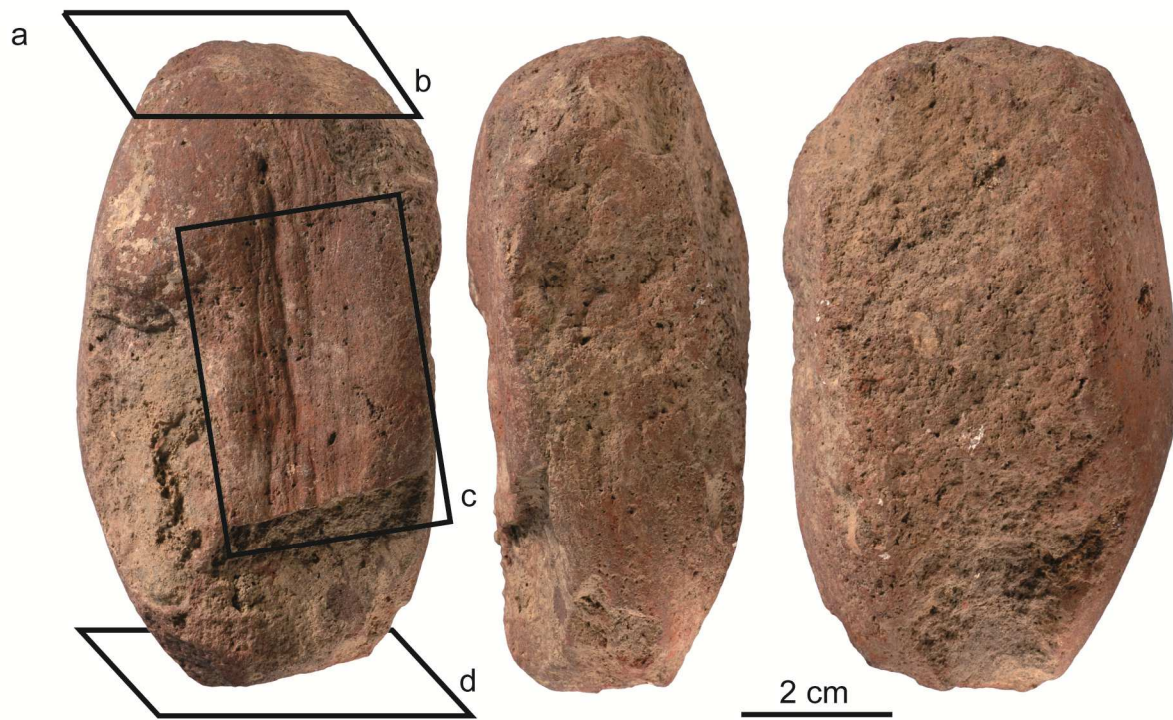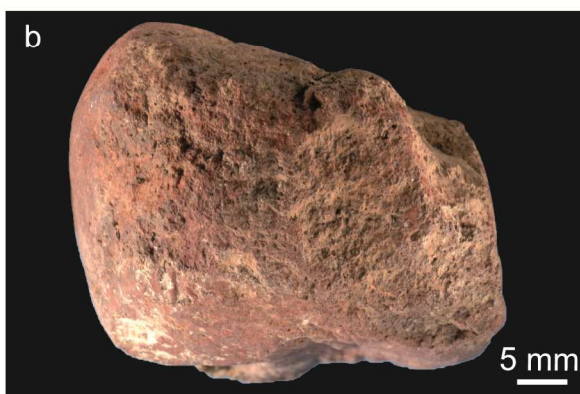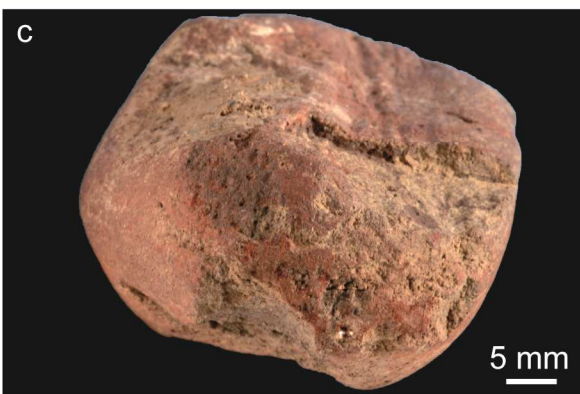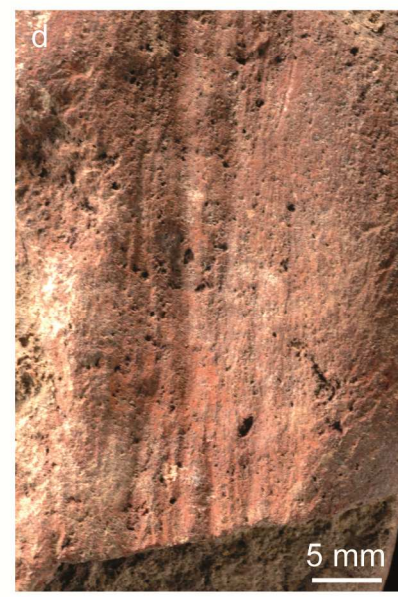

**Fig I. Results of analyses conducted on ochre processing tool 20 (upper grindstone).**  
a: Photo of the object. Squares indicate the location of macro photos (b–d); macro photos of pits associated to smoothed areas (b, c), flake scar (c), and deep grooves (d).

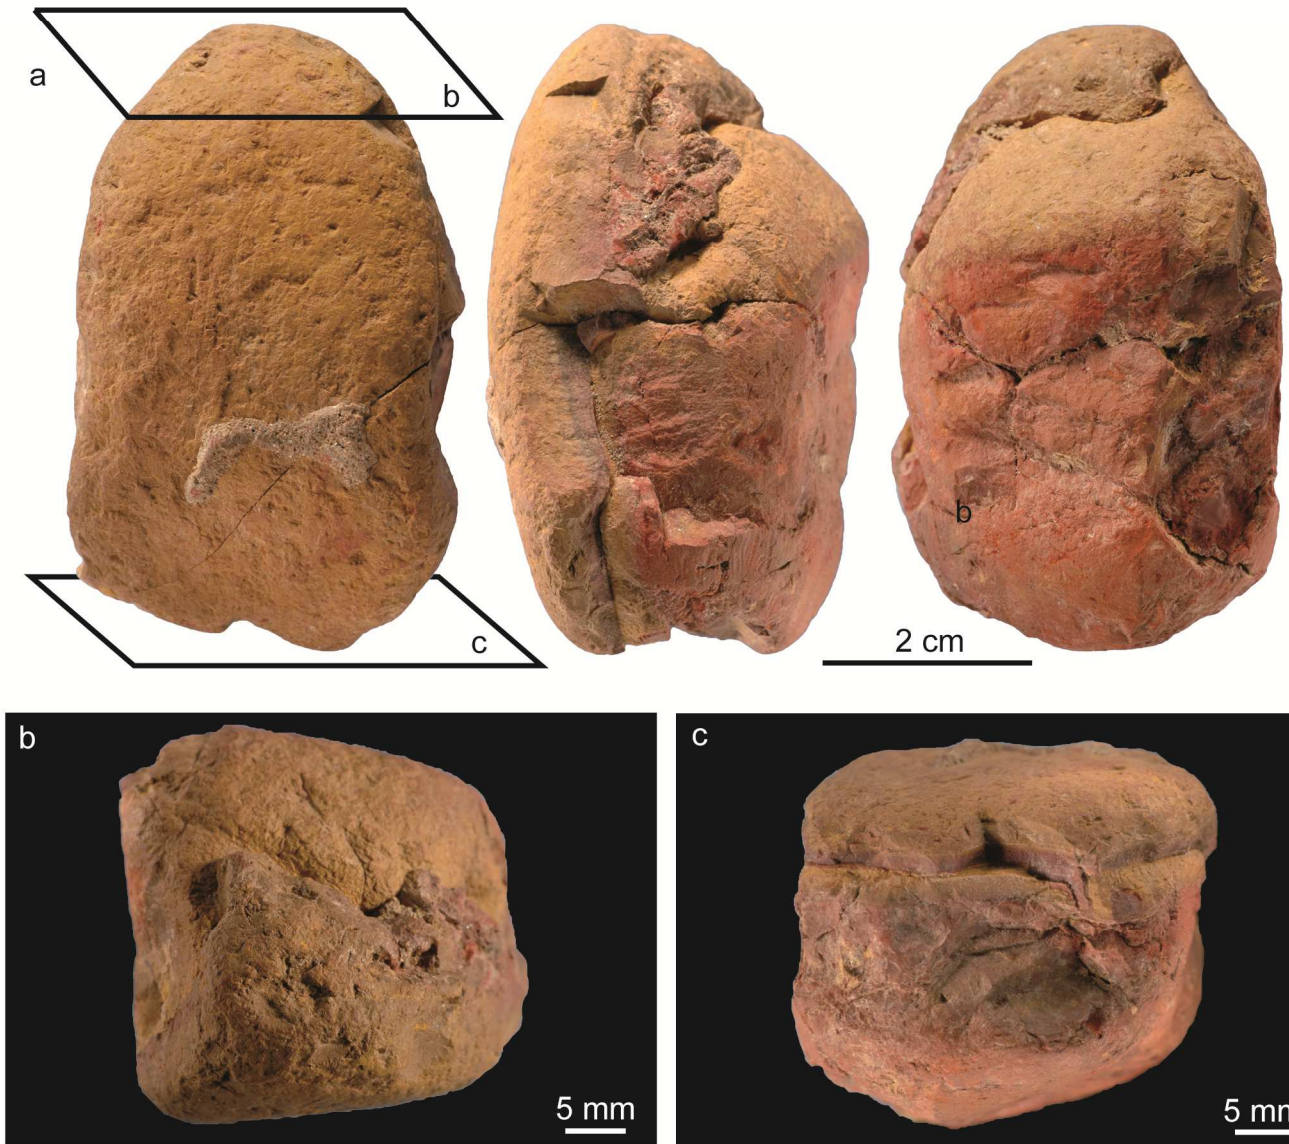

**Fig J. Results of analyses conducted on ochre processing tool 21 (upper grindstone).**  
a: Photo of the object. Squares indicate the location of photos b and c; photos of pits (b, c) and flake scars (c).

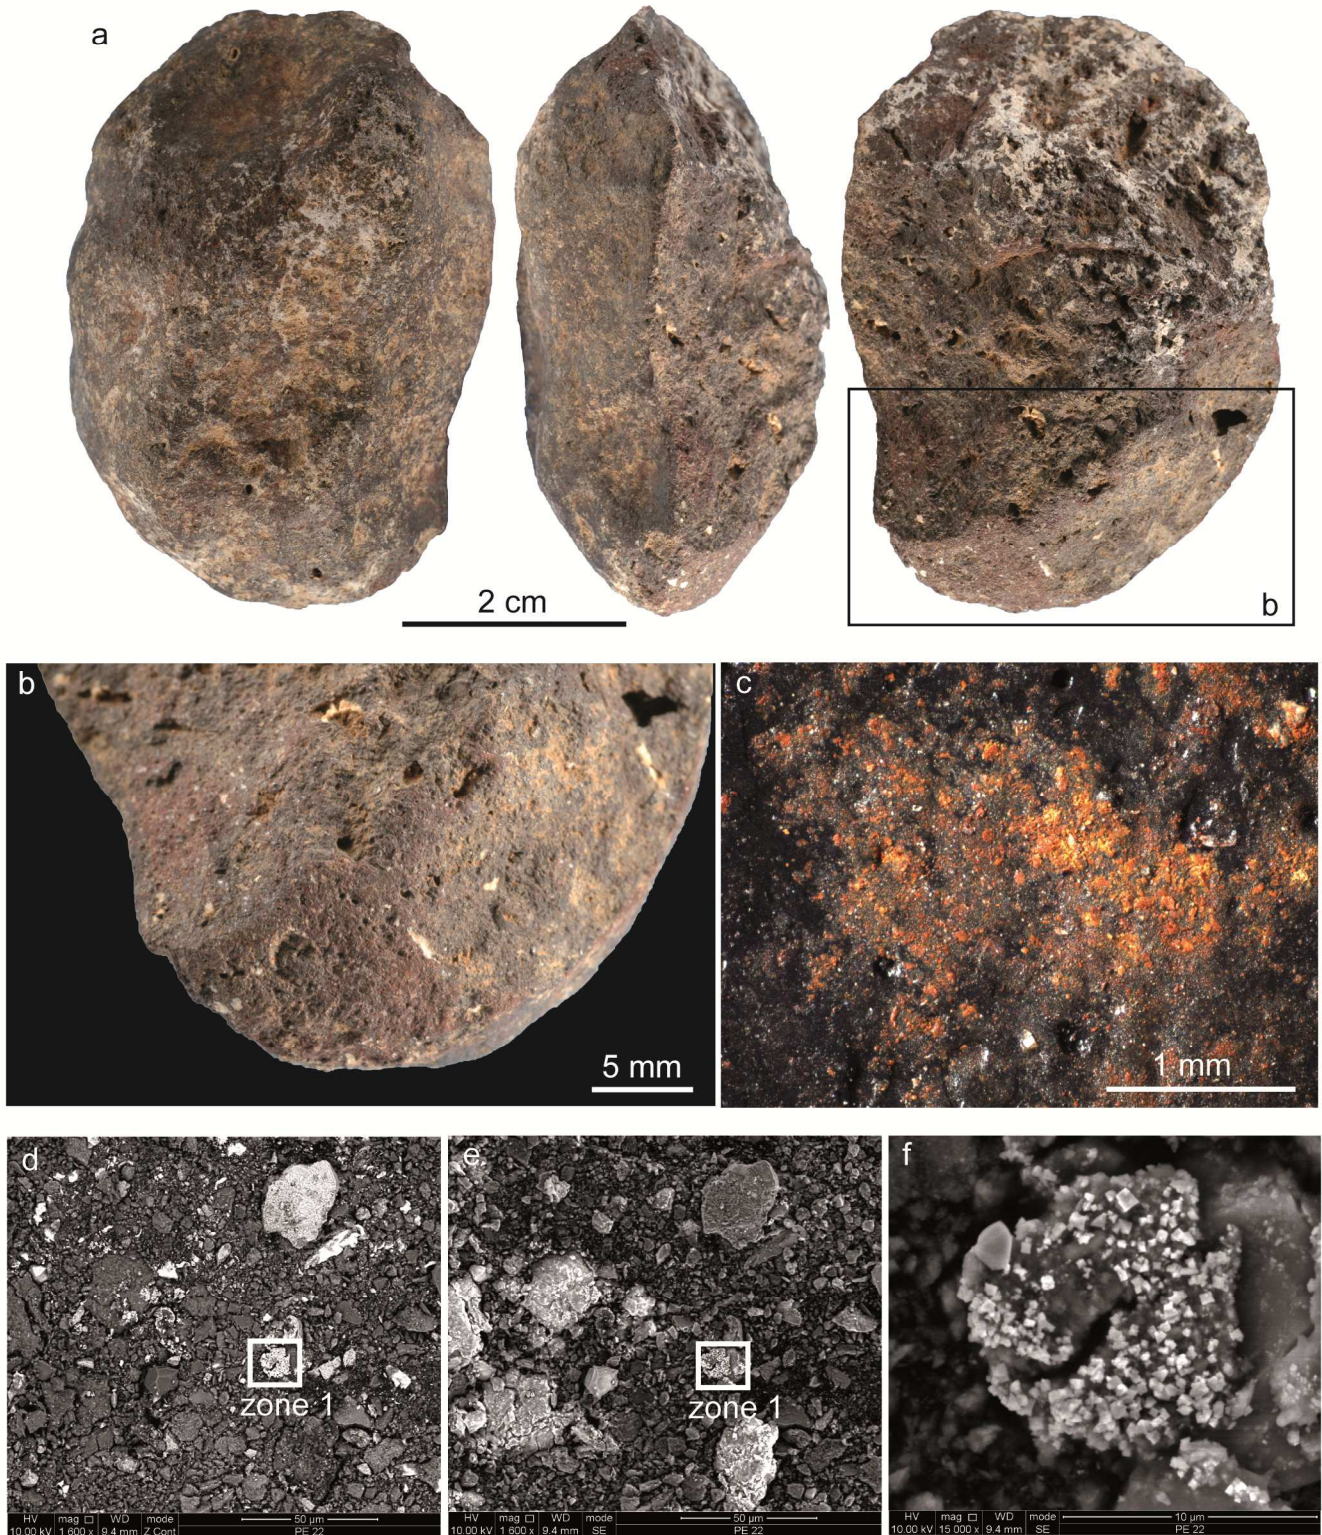

**Fig K. Results of analyses conducted on ochre processing tool 22 (upper grindstone).**

a: Photo of the object. Square indicates the location of macro photo b; b: macro photo of pits; c: photo of the sampled ochre residue (sample AT22); SEM images in BSE (d) and SE (e) modes of sample AT22 (zone 1 indicates the area represented in c); SEM image in SE mode of sample AT22 zone 1.

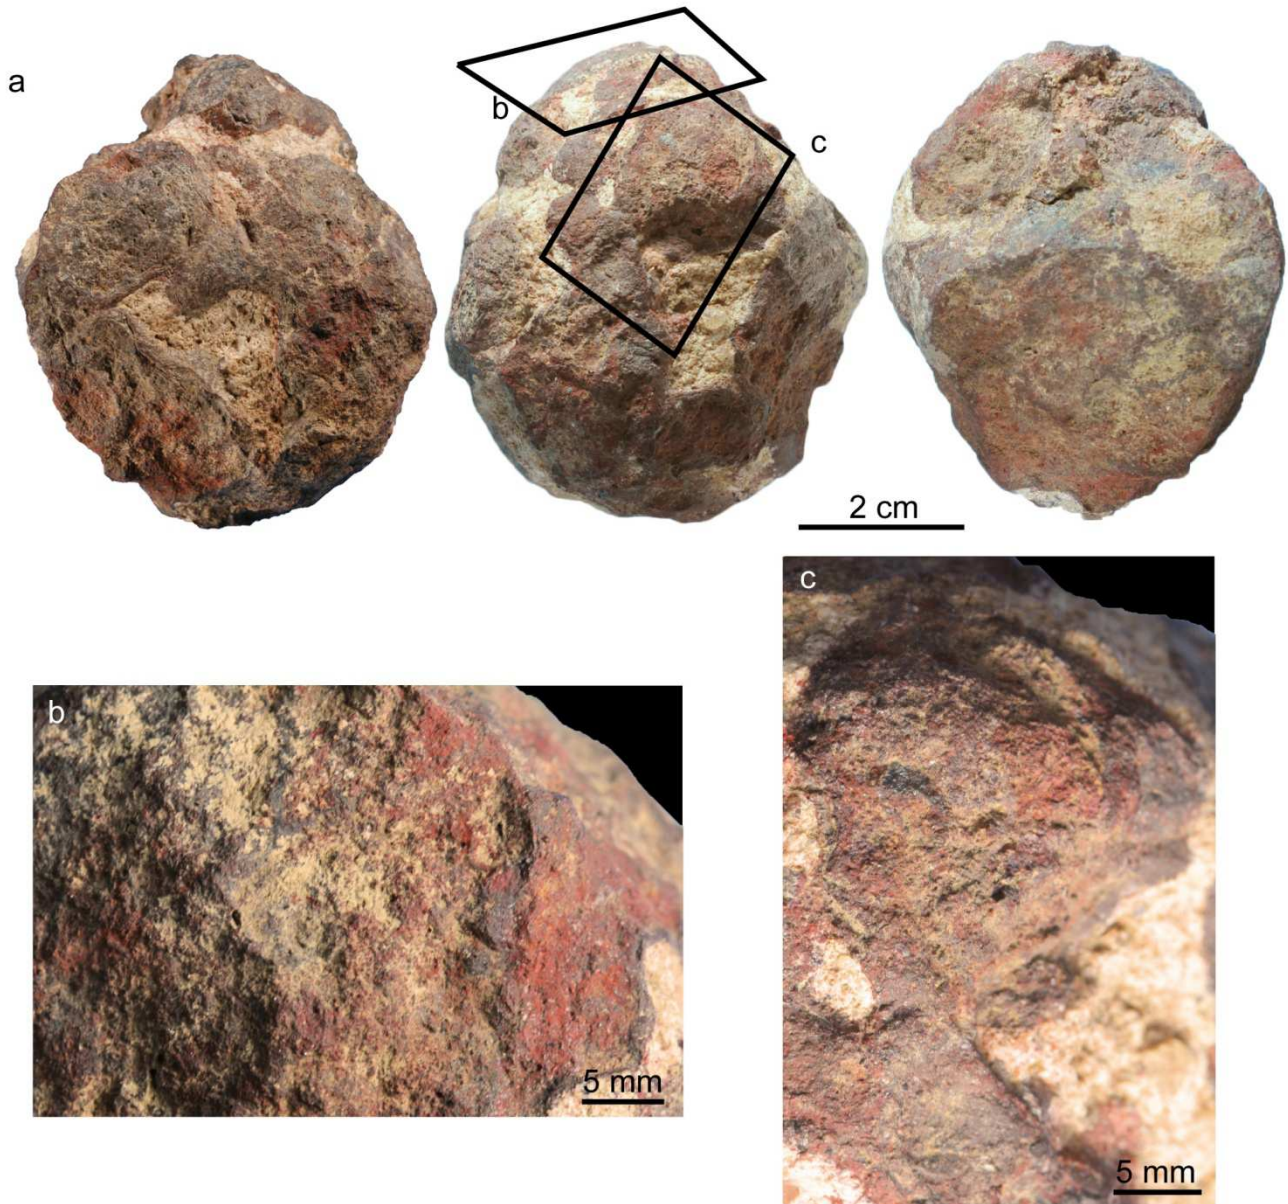

**Fig L. Results of analyses conducted on ochre processing tool 23 (upper grindstone).**  
a: Photo of the object. Squares indicate the position of macro photos b and c; b, c: macro photos of pits.
